# Supplementary material for: A comparison of calibration strategies for quantitative laser ablation ICP-mass spectrometry (LA-ICP-MS) analysis of fused catalyst samples
Source: Royal Society of Chemistry journal article supplement (doi:10.1039/d3ja00271c), 2024-01-01
Supplement: d3ja00271c1.pdf [file d3ja00271c1.pdf]

## Electronic Supplementary Information (ESI)

### A comparison of calibration strategies for quantitative laser ablation ICP-mass spectrometry (LA-ICP-MS) analysis of fused catalyst samples

Ana Rua-Ibarz<sup>a,φ</sup>, Thibaut Van Acker<sup>a</sup>, Eduardo Bolea-Fernandez<sup>a,φ</sup>, Marina Bocconelli<sup>b</sup>, Frank  
Vanhaecke<sup>a\*</sup>

<sup>a</sup>Ghent University, Department of Chemistry, Atomic & Mass Spectrometry – A&MS research  
group, Campus Sterre, Krijgslaan 281-S12, 9000 Ghent, Belgium

<sup>b</sup>TotalEnergies OneTech Belgium, Zone Industrielle C, 7181 Feluy, Belgium

<sup>φ</sup>Current affiliation: Department of Analytical Chemistry, Aragón Institute of Engineering  
Research (I3A), University of Zaragoza, Pedro Cerbuna 12, 50009, Zaragoza, Spain

\*Corresponding author. E-mail: Frank.Vanhaecke@UGent.be

## **Table of contents:**

**Figure S1.** Examples of the correlation lines obtained with the MSC approach when using one CRM as sample and another CRM as standard (NIST SRM 612 vs NIST SRM 610) for all analytes upon modification of the repetition rate (A) and the beam diameter (B).

**Figure S2.** Examples of the correlation lines obtained with the MSC approach when measuring one catalyst sample and using a CRM as standard (Bead 24 vs NIST SRM 610) for all analytes upon modification of the repetition rate (A) and the beam diameter (B).

**Figure S3.** Examples of the correlation lines obtained with the MSC approach when measuring one catalyst as sample and the other catalyst as standard (Bead 24 vs Bead 22) for all analytes upon modification of the repetition rate (A) and the beam diameter (B).

**Figure S4.** Examples of the correlation lines obtained with the MSC approach when measuring one catalyst sample and using a fused bead obtained from a powdered CRM as standard (Bead 24 vs BHVO-2) for all analytes upon modification of the repetition rate (A) and the beam diameter (B).

**Table S1.** Target element concentration data for the two catalyst samples obtained by XRF.

**Table S2.** Reference concentration values of Li, V, Co, Ni and Mo for the glass standard reference materials. Uncertainty expressed as 95 % confidence level.

**Table S3.** Experimentally determined concentrations (LA-ICP-MS) for the SRMs using external calibration as calibration strategy.

**Table S4.** Experimentally determined concentrations (LA-ICP-MS) for the two catalyst samples using external calibration as calibration strategy.

**Table S5.** Experimentally determined (LA-ICP-MS) concentration for the SRMs using the multi-signal calibration strategy (modification of the laser repetition rate or laser beam diameter). NIST SRM 610 was used as the 'reference standard'.

**Table S6.** Experimentally determined (LA-ICP-MS) concentrations for the two catalyst samples obtained using the multi-signal calibration strategy (modification of the laser repetition rate or laser beam diameter) with five reference materials used as reference standards.

**Table S7.** Experimentally determined (LA-ICP-MS) concentrations for one catalyst sample (Bead 22) using the multi-signal calibration strategy (modification of the laser repetition rate or laser beam diameter) with the other catalyst sample (Bead 24) used as reference standard.

**Table S8.** Experimentally determined (LA-ICP-MS) concentrations vs reference (XRF) concentrations for the two catalyst samples using the multi-signal calibration strategy (modification of the laser repetition rate or laser beam diameter) with a fused bead of powdered BHVO-2 reference material (embedded as fused bead) used as reference standard.

**Table S9.** Experimentally determined (LA-ICP-MS) concentrations for the two catalyst samples using the solution-based calibration approach.

**Figure S1.** Examples of the correlation lines obtained with the MSC approach when using one CRM as sample and another CRM as standard (NIST SRM 612 vs NIST SRM 610) for all analytes upon modification of the repetition rate (A) and the beam diameter (B).

*(A) Repetition rate*

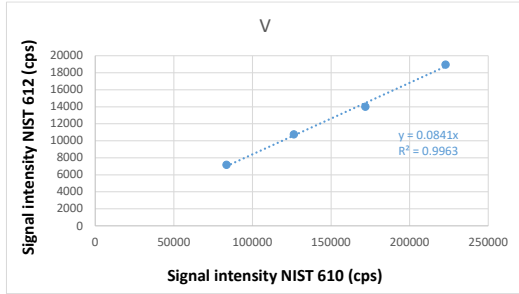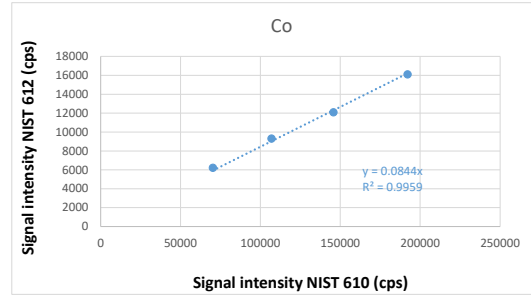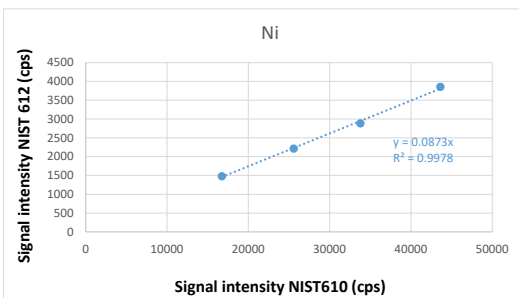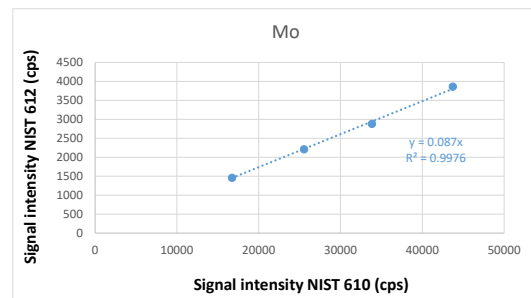

*(B) Beam diameter*

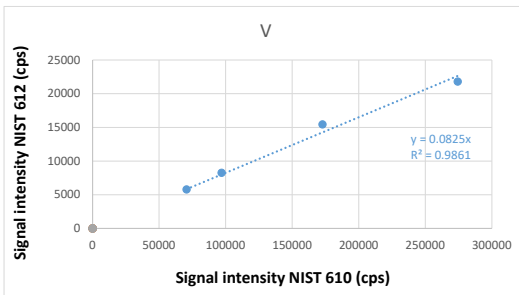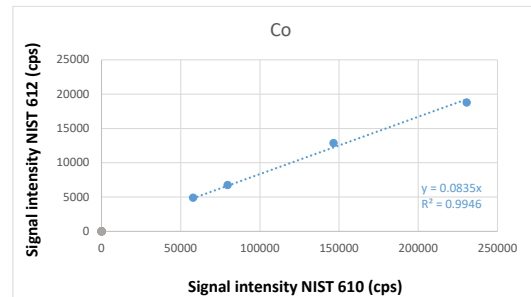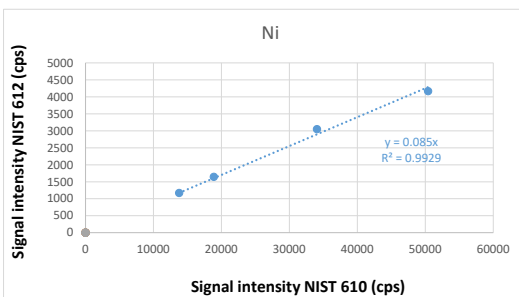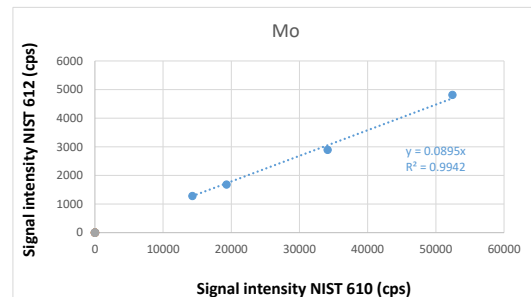

**Figure S2.** Examples of the correlation lines obtained with the MSC approach when measuring one catalyst sample and using a CRM as standard (Bead 24 vs NIST SRM 610) for all analytes upon modification of the repetition rate (A) and the beam diameter (B).

*(A) Repetition rate*

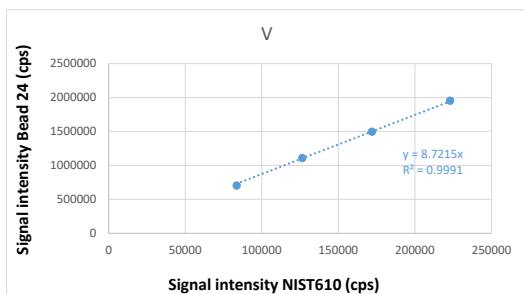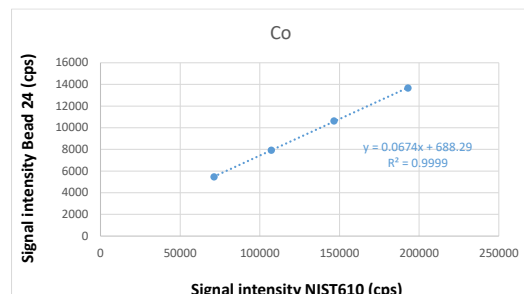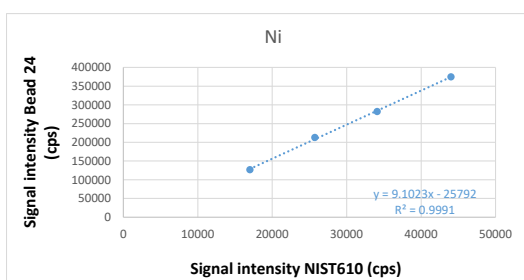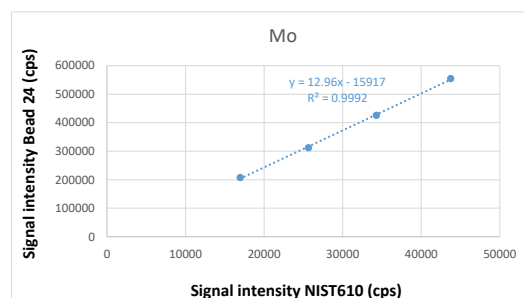

*(B) Beam diameter*

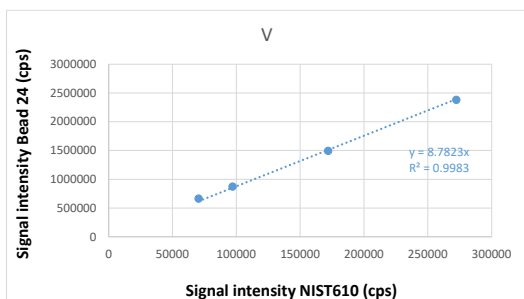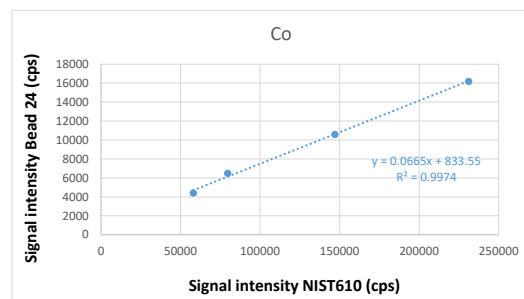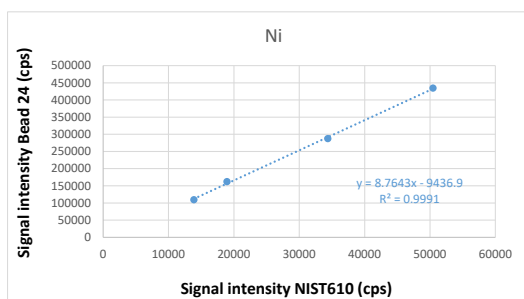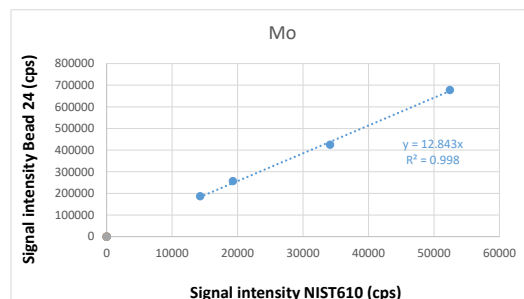

**Figure S3.** Examples of the correlation lines obtained with the MSC approach when measuring one catalyst as sample and the other catalyst as standard (Bead 24 vs Bead 22) for all analytes upon modification of the repetition rate (A) and the beam diameter (B).

*(A) Repetition rate*

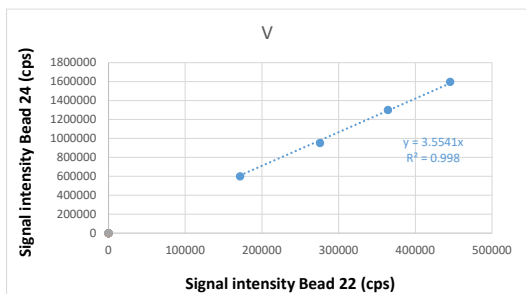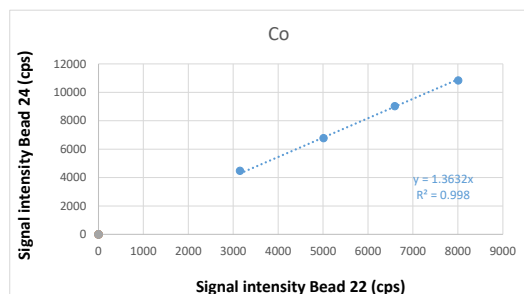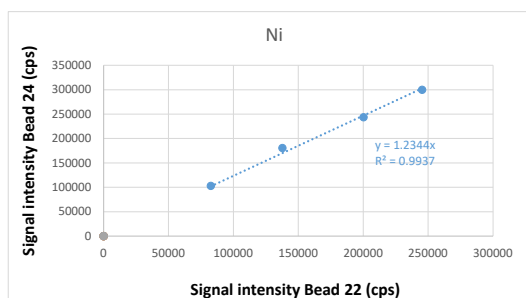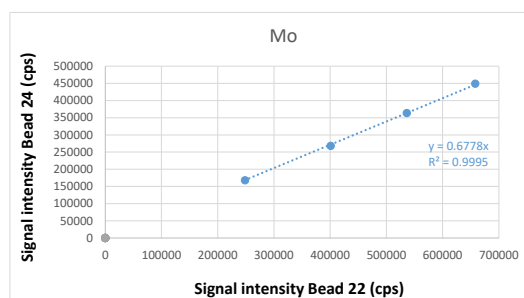

*(B) Beam diameter*

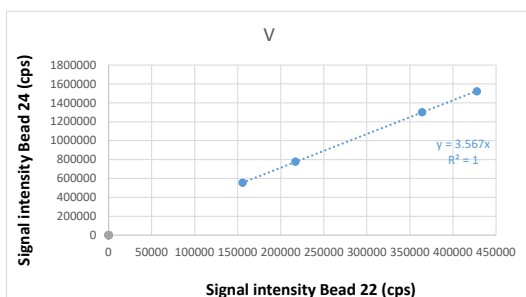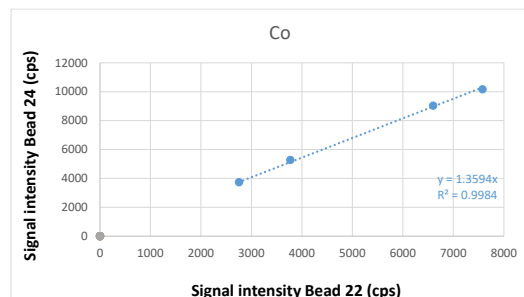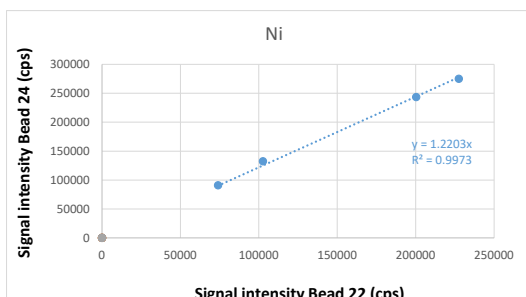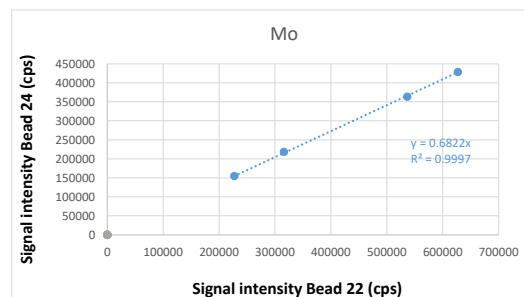

**Figure S4.** Examples of the correlation lines obtained with the MSC approach when measuring one catalyst sample and using a fused bead obtained from a powdered CRM as standard (Bead 24 vs BHVO-2) for all analytes upon modification of the repetition rate (A) and the beam diameter (B).

(A) Repetition rate

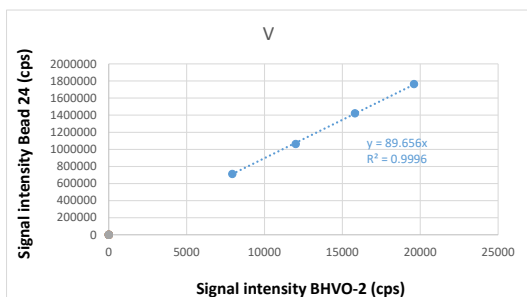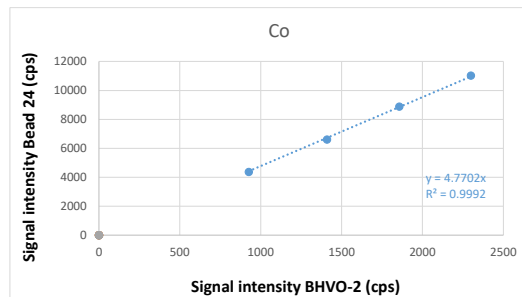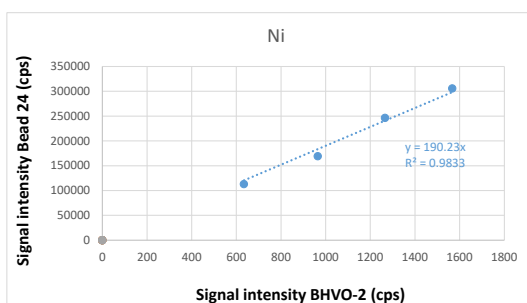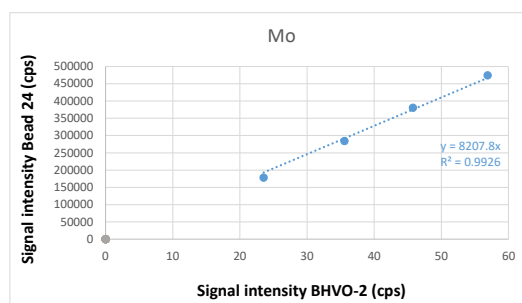

(B) Beam diameter

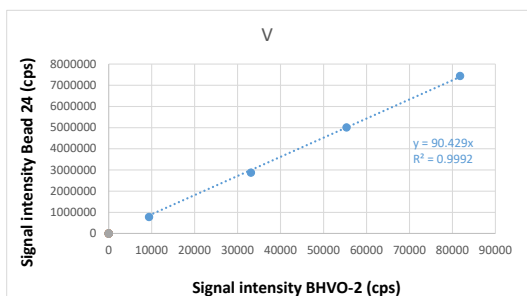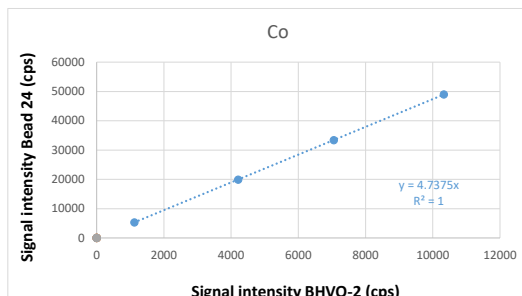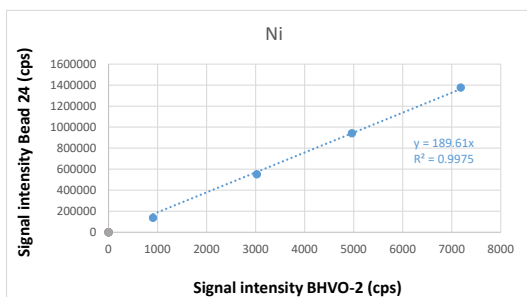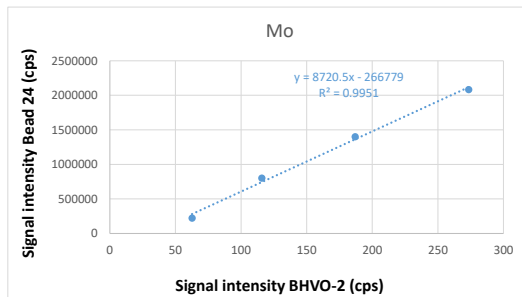

**Table S1.** Target element concentration data for the two catalyst samples obtained by XRF.

|                | <b>V (mg kg<sup>-1</sup>)</b> | <b>Co (mg kg<sup>-1</sup>)</b> | <b>Ni (mg kg<sup>-1</sup>)</b> | <b>Mo (mg kg<sup>-1</sup>)</b> |
|----------------|-------------------------------|--------------------------------|--------------------------------|--------------------------------|
| <b>Bead 22</b> | 1290 ± 130                    | 27.30 ± 2.73                   | 3370 ± 337                     | 9100 ± 910                     |
| <b>Bead 24</b> | 4660 ± 470                    | 36.70 ± 3.67                   | 4050 ± 405                     | 5920 ± 592                     |

**Table S2.** Reference concentration values of Li, V, Co, Ni and Mo for the glass standard reference materials. Uncertainty expressed as 95 % confidence level.<sup>1</sup>

|                 |                 |             | Concentration (mg kg <sup>-1</sup> ) |       |       |       |       |
|-----------------|-----------------|-------------|--------------------------------------|-------|-------|-------|-------|
|                 |                 |             | Li                                   | V     | Co    | Ni    | Mo    |
| MPI-DING ATHO-G | Rhyolite glass  | value       | 28.6                                 | 3.91  | 2.13  | 13    | 4.8   |
|                 |                 | uncertainty | 1.8                                  | 0.34  | 0.47  | 5     | 1     |
| NIST SRM 612    | Synthetic glass | value       | 40.2                                 | 38.8  | 35.5  | 38.8  | 37.4  |
|                 |                 | uncertainty | 1.3                                  | 1.2   | 1     | 0.2   | 1.5   |
| USGS GSD-1G     | Basalt glass    | value       | 43                                   | 44    | 40    | 58    | 39    |
|                 |                 | uncertainty | 6                                    | 2     | 2     | 4     | 3     |
| MPI-DING T1-G   | Diorite glass   | value       | 19.9                                 | 190   | 18.9  | 10.6  | 4.2   |
|                 |                 | uncertainty | 0.9                                  | 11    | 0.8   | 1.3   | 1.8   |
| USGS BHVO-2G    | Basalt glass    | value       | 4.4                                  | 308   | 44    | 116   | 3.8   |
|                 |                 | uncertainty | 0.8                                  | 19    | 2     | 7     | 0.2   |
| BIR-1G          | Basalt glass    | value       | 3.0                                  | 326   | 52    | 178   | 0.075 |
|                 |                 | uncertainty | 0.7                                  | 32    | 5     | 18    | 0.011 |
| USGS BCR-2G     | Basalt glass    | value       | 9                                    | 425   | 38    | 13    | 270   |
|                 |                 | uncertainty | 1                                    | 18    | 2     | 2     | 30    |
| USGS GSE-1G     | Basalt glass    | value       | 430                                  | 440   | 380   | 440   | 390   |
|                 |                 | uncertainty | 60                                   | 20    | 20    | 30    | 30    |
| NIST SRM 610    | Synthetic glass | value       | 468                                  | 450   | 410   | 458.7 | 417   |
|                 |                 | uncertainty | 24                                   | 9     | 10    | 4.0   | 21    |
| USGS BHVO-2     | Hawaiian basalt | value       | 4.50                                 | 318.2 | 44.89 | 119.8 | 4.07  |
|                 |                 | uncertainty | 0.085                                | 2.3   | 0.32  | 1.2   | 0.16  |



**Table S3.** Experimentally determined concentrations (LA-ICP-MS) for the CRMs using external calibration as calibration strategy.

|                     | V (mg kg <sup>-1</sup> ) | Co (mg kg <sup>-1</sup> ) | Ni (mg kg <sup>-1</sup> ) | Mo (mg kg <sup>-1</sup> ) |
|---------------------|--------------------------|---------------------------|---------------------------|---------------------------|
| <b>ATHO-G</b>       | 7.54 ± 8.19              | 3.12 ± 3.95               | 12.0 ± 6.4                | 4.30 ± 8.18               |
| <b>NIST SRM 612</b> | 49.3 ± 8.2               | 40.1 ± 3.9                | 47.3 ± 6.2                | 40.1 ± 8.1                |
| <b>GSD-1G</b>       | 48.2 ± 8.6               | 39.4 ± 4.1                | 62.1 ± 7.5                | 36.3 ± 8.5                |
| <b>T1-G</b>         | 167 ± 14                 | 18.3 ± 3.9                | 13.3 ± 6.3                | 5.50 ± 8.09               |
| <b>BHVO-2G</b>      | 307 ± 17                 | 42.8 ± 4.1                | 116 ± 9                   | 4.31 ± 8.08               |
| <b>BIR-1G</b>       | 274 ± 21                 | 43.8 ± 4.1                | 145 ± 14                  | < LoQ                     |
| <b>BCR-2G</b>       | 457 ± 13                 | 42.1 ± 3.9                | 16.3 ± 6.3                | 270 ± 12                  |
| <b>GSE-1G</b>       | 405 ± 18                 | 345 ± 7                   | 409 ± 19                  | 352 ± 18                  |
| <b>NIST SRM 610</b> | 498 ± 9                  | 443 ± 6                   | 500 ± 9                   | 452 ± 10                  |

**Table S4.** Experimentally determined concentrations (LA-ICP-MS) for the two catalyst samples using external calibration as calibration strategy.

|                |                   | V (mg kg <sup>-1</sup> ) | Co (mg kg <sup>-1</sup> ) | Ni (mg kg <sup>-1</sup> ) | Mo (mg kg <sup>-1</sup> ) |
|----------------|-------------------|--------------------------|---------------------------|---------------------------|---------------------------|
| <b>Bead 22</b> | <b>Without IS</b> | 928 ± 31                 | 21.8 ± 4.0                | 2550 ± 94                 | 6130 ± 213                |
|                | <b>With IS</b>    | 1220 ± 14                | 29.1 ± 4.0                | 3110 ± 22                 | 7690 ± 25                 |
| <b>Bead 24</b> | <b>Without IS</b> | 3930 ± 110               | 31.7 ± 4.0                | 3660 ± 112                | 5000 ± 155                |
|                | <b>With IS</b>    | 4330 ± 50                | 35.7 ± 3.9                | 3760 ± 25                 | 5270 ± 43                 |

**Table S5.** Experimentally determined (LA-ICP-MS) concentration for the SRMs using the multi-signal calibration strategy (modification of the laser repetition rate or laser beam diameter). NIST SRM 610 was used as the 'reference standard'.

|                 |            |              | V (mg kg <sup>-1</sup> ) | Co (mg kg <sup>-1</sup> ) | Ni (mg kg <sup>-1</sup> ) | Mo (mg kg <sup>-1</sup> ) |
|-----------------|------------|--------------|--------------------------|---------------------------|---------------------------|---------------------------|
| Repetition rate | Without IS | NIST SRM 612 | 35.3 ± 0.8               | 31.0 ± 1.2                | 37.9 ± 0.4                | 34.9 ± 1.8                |
|                 |            | GSE-1G       | 404 ± 12                 | 365 ± 10                  | 431 ± 13                  | 366 ± 21                  |
|                 |            | GSD-1G       | 38.5 ± 3.3               | 35.0 ± 2.9                | 58.2 ± 6.3                | 36.2 ± 3.7                |
|                 |            | BHVO-2G      | 264 ± 9.4                | 35.1 ± 2.0                | 103 ± 4.7                 | 3.38 ± 0.22               |
|                 | With IS    | NIST SRM 612 | 36.7 ± 1.4               | 32.4 ± 1.0                | 39.5 ± 1.0                | 36.3 ± 2.0                |
|                 |            | GSE-1G       | 419 ± 10                 | 380 ± 15                  | 446 ± 4.9                 | 380 ± 19                  |
|                 |            | GSD-1G       | 39.9 ± 2.2               | 36.1 ± 2.2                | 60.3 ± 1.7                | 37.5 ± 2.3                |
|                 |            | BHVO-2G      | 313 ± 8                  | 41.6 ± 1.2                | 121 ± 1.1                 | 3.99 ± 0.20               |
| Spot size       | Without IS | NIST SRM 612 | 31.8 ± 2.2               | 27.1 ± 3.2                | 36.5 ± 2.0                | 36.1 ± 1.8                |
|                 |            | GSE-1G       | 376 ± 8.6                | 335 ± 8.2                 | 391 ± 20                  | 352 ± 18                  |
|                 |            | GSD-1G       | 39.8 ± 1.2               | 37.3 ± 1.1                | 53.8 ± 1.8                | 35.9 ± 2.1                |
|                 |            | BHVO-2G      | 262 ± 12                 | 40.5 ± 1.0                | 101 ± 5.6                 | 4.46 ± 1.6                |
|                 | With IS    | NIST SRM 612 | 35.5 ± 2.8               | 33.1 ± 1.7                | 37.8 ± 2.1                | 38.5 ± 2.7                |
|                 |            | GSE-1G       | 452 ± 14                 | 386 ± 10                  | 451 ± 14                  | 395 ± 24                  |
|                 |            | GSD-1G       | 42.3 ± 0.9               | 41.5 ± 1.0                | 58.5 ± 3.6                | 38.8 ± 2.9                |
|                 |            | BHVO-2G      | 301 ± 6.1                | 43.1 ± 1.1                | 119 ± 4.4                 | 4.17 ± 1.5                |

**Table S6.** Experimentally determined (LA-ICP-MS) concentrations for the two catalyst samples obtained using the multi-signal calibration strategy (modification of the laser repetition rate or laser beam diameter) with five reference materials used as reference standards.

| Bead 22         |            |              | V (mg kg <sup>-1</sup> ) | Co (mg kg <sup>-1</sup> ) | Ni (mg kg <sup>-1</sup> ) | Mo (mg kg <sup>-1</sup> ) |
|-----------------|------------|--------------|--------------------------|---------------------------|---------------------------|---------------------------|
| Repetition rate | Without IS | NIST SRM 610 | 884 ± 59                 | 16.3 ± 1.4                | 2840 ± 185                | 6350 ± 473                |
|                 |            | GSE-1G       | 962 ± 78                 | 16.9 ± 1.8                | 2900 ± 250                | 6750 ± 659                |
|                 |            | BHVO-2G      | 1030 ± 86                | 20.4 ± 1.5                | 3210 ± 215                | 7130 ± 509                |
|                 |            | NIST SRM 612 | 972 ± 64                 | 18.6 ± 1.1                | 2900 ± 172                | 6800 ± 437                |
|                 |            | GSD-1G       | 990 ± 146                | 18.2 ± 3.9                | 2730 ± 507                | 667 ± 1096                |
|                 | With IS    | NIST SRM 610 | 1110 ± 37                | 20.4 ± 0.8                | 3540 ± 87                 | 7940 ± 412                |
|                 |            | GSE-1G       | 1160 ± 56                | 20.5 ± 1.3                | 3440 ± 245                | 8100 ± 626                |
|                 |            | BHVO-2G      | 1030 ± 66                | 20.5 ± 1.0                | 3130 ± 199                | 7110 ± 404                |
|                 |            | NIST SRM 612 | 1170 ± 44                | 22.5 ± 0.7                | 3500 ± 127                | 8190 ± 347                |
|                 |            | GSD-1G       | 1230 ± 77                | 22.8 ± 1.3                | 3400 ± 263                | 8330 ± 706                |
| Spot size       | Without IS | NIST SRM 610 | 909 ± 41                 | 17.7 ± 0.6                | 2880 ± 81                 | 6430 ± 401                |
|                 |            | GSE-1G       | 1030 ± 124               | 19.7 ± 2.1                | 3170 ± 223                | 7280 ± 849                |
|                 |            | BHVO-2G      | 977 ± 79                 | 19.4 ± 1.2                | 3010 ± 187                | 7500 ± 1073               |
|                 |            | NIST SRM 612 | 948 ± 39                 | 17.8 ± 0.7                | 2740 ± 121                | 6720 ± 573                |
|                 |            | GSD-1G       | 1000 ± 49                | 19.0 ± 0.9                | 2900 ± 229                | 7430 ± 277                |
|                 | With IS    | NIST SRM 610 | 1430 ± 30                | 24.0 ± 0.7                | 4090 ± 91                 | 10300 ± 550               |
|                 |            | GSE-1G       | 1100 ± 142               | 20.9 ± 2.4                | 3470 ± 487                | 8200 ± 1504               |
|                 |            | BHVO-2G      | 1270 ± 90                | 27.6 ± 1.3                | 3990 ± 269                | 9160 ± 1360               |
|                 |            | NIST SRM 612 | 1280 ± 41                | 24.1 ± 0.7                | 3700 ± 215                | 8190 ± 722                |
|                 |            | GSD-1G       | 1230 ± 63                | 25.8 ± 1.5                | 3670 ± 325                | 9530 ± 760                |

| Bead 24         |            | V (mg kg <sup>-1</sup> ) | Co (mg kg <sup>-1</sup> ) | Ni (mg kg <sup>-1</sup> ) | Mo (mg kg <sup>-1</sup> ) |            |
|-----------------|------------|--------------------------|---------------------------|---------------------------|---------------------------|------------|
| Repetition rate | Without IS | NIST SRM 610             | 3670 ± 78                 | 24.3 ± 0.8                | 3820 ± 109                | 4940 ± 250 |
|                 |            | GSE-1G                   | 4000 ± 218                | 25.3 ± 1.6                | 3890 ± 331                | 5250 ± 435 |
|                 |            | BHVO-2G                  | 4280 ± 303                | 30.4 ± 1.8                | 4290 ± 354                | 5540 ± 390 |
|                 |            | NIST SRM 612             | 4040 ± 126                | 27.8 ± 0.8                | 3910 ± 97                 | 5300 ± 219 |
|                 |            | GSD-1G                   | 4140 ± 385                | 27.4 ± 3.1                | 3700 ± 529                | 5250 ± 598 |
|                 | With IS    | NIST SRM 610             | 4060 ± 99                 | 27.0 ± 0.7                | 4210 ± 93                 | 5460 ± 289 |
|                 |            | GSE-1G                   | 4240 ± 199                | 27.2 ± 1.7                | 4090 ± 288                | 5570 ± 433 |
|                 |            | BHVO-2G                  | 3770 ± 240                | 27.3 ± 1.3                | 3730 ± 243                | 4880 ± 285 |
|                 |            | NIST SRM 612             | 4300 ± 152                | 29.6 ± 1.0                | 4150 ± 123                | 5630 ± 231 |
|                 |            | GSD-1G                   | 4510 ± 295                | 30.1 ± 2.0                | 4050 ± 280                | 5730 ± 501 |
| Spot size       | Without IS | NIST SRM 610             | 3570 ± 87                 | 25.5 ± 0.6                | 3790 ± 43                 | 4970 ± 277 |
|                 |            | GSE-1G                   | 4620 ± 411                | 32.5 ± 2.1                | 4670 ± 543                | 6490 ± 889 |
|                 |            | BHVO-2G                  | 3800 ± 288                | 29.0 ± 1.2                | 3900 ± 249                | 7350 ± 387 |
|                 |            | NIST SRM 612             | 3730 ± 156                | 26.9 ± 0.7                | 3600 ± 19.8               | 4980 ± 261 |
|                 |            | GSD-1G                   | 3960 ± 192                | 28.6 ± 0.9                | 3810 ± 264                | 5500 ± 426 |
|                 | With IS    | NIST SRM 610             | 3810 ± 94                 | 27.5 ± 0.8                | 4050 ± 61                 | 5300 ± 313 |
|                 |            | GSE-1G                   | 3660 ± 412                | 25.1 ± 2.0                | 3790 ± 524                | 5200 ± 967 |
|                 |            | BHVO-2G                  | 4590 ± 302                | 31.8 ± 2.7                | 4410 ± 389                | 6940 ± 889 |
|                 |            | NIST SRM 612             | 4790 ± 217                | 34.2 ± 1.8                | 4480 ± 211                | 5210 ± 676 |
|                 |            | GSD-1G                   | 4880 ± 247                | 34.5 ± 1.9                | 4400 ± 358                | 5750 ± 663 |

**Table S7.** Experimentally determined (LA-ICP-MS) concentrations for one catalyst sample (Bead 22) using the multi-signal calibration strategy (modification of the laser repetition rate or laser beam diameter) with the other catalyst sample (Bead 24) used as reference standard.

|                |                        |                   | V (mg kg <sup>-1</sup> ) | Co (mg kg <sup>-1</sup> ) | Ni (mg kg <sup>-1</sup> ) | Mo (mg kg <sup>-1</sup> ) |
|----------------|------------------------|-------------------|--------------------------|---------------------------|---------------------------|---------------------------|
| <b>Bead 22</b> | <b>Repetition rate</b> | <b>Without IS</b> | 1120 ± 132               | 24.6 ± 2.9                | 3010 ± 356                | 7600 ± 887                |
|                |                        | <b>With IS</b>    | 1270 ± 131               | 27.8 ± 2.8                | 3410 ± 374                | 8610 ± 867                |
|                | <b>Spot size</b>       | <b>Without IS</b> | 1180 ± 119               | 24.3 ± 2.5                | 3080 ± 339                | 8000 ± 808                |
|                |                        | <b>With IS</b>    | 1310 ± 132               | 27.6 ± 2.8                | 3410 ± 346                | 8690 ± 872                |

**Table S8.** Experimentally determined (LA-ICP-MS) concentrations vs reference (XRF) concentrations for the two catalyst samples using the multi-signal calibration strategy (modification of the laser repetition rate or laser beam diameter) with a fused bead of powdered BHVO-2 reference material (embedded as fused bead) used as reference standard.

|                |                        |                   | V (mg kg <sup>-1</sup> ) | Co (mg kg <sup>-1</sup> ) | Ni (mg kg <sup>-1</sup> ) | Mo (mg kg <sup>-1</sup> ) |
|----------------|------------------------|-------------------|--------------------------|---------------------------|---------------------------|---------------------------|
| <b>Bead 22</b> | <b>Repetition rate</b> | <b>Without IS</b> | 1000 ± 12                | 20.3 ± 0.4                | 2560 ± 382                | 6420 ± 199                |
|                |                        | <b>With IS</b>    | 1290 ± 11                | 26.9 ± 0.4                | 3320 ± 190                | 8400 ± 386                |
|                | <b>Spot size</b>       | <b>Without IS</b> | 1110 ± 18                | 22.5 ± 0.3                | 2710 ± 43                 | 6740 ± 725                |
|                |                        | <b>With IS</b>    | 1330 ± 16                | 26.6 ± 0.4                | 3300 ± 17                 | 8250 ± 731                |
| <b>Bead 24</b> | <b>Repetition rate</b> | <b>Without IS</b> | 3250 ± 60                | 24.7 ± 0.4                | 2880 ± 482                | 4120 ± 95                 |
|                |                        | <b>With IS</b>    | 4650 ± 63                | 35.4 ± 0.4                | 4090 ± 223                | 5870 ± 144                |
|                | <b>Spot size</b>       | <b>Without IS</b> | 4280 ± 107               | 31.0 ± 0.1                | 3470 ± 38                 | 5160 ± 281                |
|                |                        | <b>With IS</b>    | 4730 ± 115               | 34.5 ± 0.1                | 3850 ± 35                 | 5720 ± 314                |

**Table S9.** Experimentally determined (LA-ICP-MS) concentrations for the two catalyst samples using the solution-based calibration approach.

|                | V (mg kg <sup>-1</sup> ) | Co (mg kg <sup>-1</sup> ) | Ni (mg kg <sup>-1</sup> ) | Mo (mg kg <sup>-1</sup> ) |
|----------------|--------------------------|---------------------------|---------------------------|---------------------------|
| <b>Bead 22</b> | 1320 ± 87                | 26.6 ± 4.6                | 3500 ± 138                | 9700 ± 398                |
| <b>Bead 24</b> | 4540 ± 108               | 36.2 ± 2.7                | 4350 ± 100                | 6370 ± 146                |



## References

1. K. P. Jochum, U. Nohl, K. Herwig, E. Lammel, B. Stoll and A. W. Hofmann, *Geostand. Geoanalytical Res.*, 2005, **29**, 333 – 338.
